# Supplementary material
Source: publisher figshare collection journal article supplement (https://gsapubs.figshare.com/ndownloader/files/22411662)
Supplement: Supplementary file 1 [file 22411662]

## Sheet: PlotDat6
Source sheet	Data	0.3	165.347	1	158.674	6.00304
Plot name	Average1	11.7	165.347	2	159.998	3.65045
Plot Type	15			3	161.44	3.36409
1st free col	8			4	163.452	3.22794
Sigma Level	1			5	164.135	6.87147
Absolute Errs	TRUE			6	164.221	1.81604
Symbol Type	1			7	165.17	1.63072
Inverse Plot	FALSE			8	165.277	2.95348
Color Plot	TRUE			9	165.923	2.57175
3D plot	FALSE			10	166.878	1.10375
Linear	FALSE			11	167.405	3.12323
Data Range	R180:S190			IsoLine	IsoLine	IsoLine	IsoLine
Filled Symbols	FALSE
ConcAge	FALSE
ConcSwap	FALSE
1st Symbol-row	1

## Sheet: PlotDat1
Source sheet	Data	0.3	176.723	1	158.674	6.00304
Plot name	Average1	124.7	176.723	2	159.998	3.65045
Plot Type	15			3	161.44	3.36409
1st free col	8			4	163.452	3.22794
Sigma Level	1			5	164.135	6.87147
Absolute Errs	TRUE			6	164.221	1.81604
Symbol Type	1			7	165.17	1.63072
Inverse Plot	FALSE			8	165.277	2.95348
Color Plot	TRUE			9	165.923	2.57175
3D plot	FALSE			10	166.878	1.10375
Linear	FALSE			11	167.405	3.12323
Data Range	R180:S303			12	168.128	2.50591
Filled Symbols	FALSE			13	168.219	9.76333
ConcAge	FALSE			14	168.708	1.66519
ConcSwap	FALSE			15	168.818	1.66627
1st Symbol-row	1			16	169.054	2.81987
				17	169.076	1.66878
				18	169.603	1.67391
				19	169.757	4.59062
				20	170.036	2.63466
				21	170.125	2.6864
				22	170.247	6.55272
				23	170.846	3.01797
				24	171.263	2.36611
				25	171.326	1.6907
				26	171.491	3.36767
				27	172.027	2.95368
				28	172.627	5.00789
				29	173.148	4.03191
				30	173.187	2.75118
				31	173.25	2.63252
				32	173.286	2.99212
				33	173.514	3.50958
				34	173.526	4.16043
				35	173.554	1.71238
				36	173.592	3.57966
				37	173.744	4.57702
				38	173.752	1.92003
				39	174.164	5.51582
				40	174.166	3.62569
				41	174.227	4.40047
				42	174.25	4.7105
				43	174.27	5.46756
				44	174.305	2.57954
				45	174.448	4.92232
				46	174.497	2.56513
				47	174.565	2.13556
				48	174.628	2.13632
				49	174.779	4.7591
				50	175.167	4.26838
				51	175.416	5.01848
				52	175.464	1.73097
				53	175.531	3.37668
				54	175.672	1.733
				55	176.119	1.28564
				56	176.121	6.3414
				57	176.171	3.70164
				58	176.392	1.74
				59	176.869	3.31483
				60	176.972	4.32921
				61	177.172	1.92235
				62	177.181	3.35554
				63	177.488	2.66102
				64	177.896	0.87732
				65	177.995	1.7556
				66	178.368	9.60538
				67	178.573	3.7514
				68	178.9	3.75819
				69	179.325	2.86503
				70	179.325	2.86503
				71	179.37	4.28093
				72	179.37	4.28093
				73	179.636	1.98415
				74	179.636	1.98415
				75	179.712	5.37009
				76	179.712	5.37009
				77	179.788	3.33332
				78	179.788	3.33332
				79	180.083	3.87147
				80	180.083	3.87147
				81	180.092	4.01375
				82	180.092	4.01375
				83	180.628	3.90085
				84	180.628	3.90085
				85	180.739	6.64793
				86	180.739	6.64793
				87	180.842	2.8711
				88	180.842	2.8711
				89	181.112	5.53632
				90	181.112	5.53632
				91	181.473	5.24302
				92	181.473	5.24302
				93	181.64	2.54328
				94	181.64	2.54328
				95	181.912	2.1883
				96	182.018	2.18957
				97	182.036	1.65131
				98	182.036	1.65131
				99	182.702	2.91822
				100	182.861	2.12744
				101	182.861	2.12744
				102	182.957	2.27285
				103	182.957	2.27285
				104	183	2.92292
				105	183.366	3.39872
				106	183.366	3.39872
				107	183.431	4.72009
				108	183.431	4.72009
				109	183.444	1.60964
				110	183.444	1.60964
				111	184.403	8.16239
				112	184.403	8.16239
				113	187.259	3.89434
				114	187.259	3.89434
				115	187.576	1.77478
				116	187.576	1.77478
				117	187.886	2.24061
				118	187.886	2.24061
				119	188.857	5.47185
				120	188.857	5.47185
				121	191.08	2.20283
				122	191.221	2.20443
				123	199.18	3.45196
				124	199.18	3.45196
				IsoLine	IsoLine	IsoLine	IsoLine

## Sheet: PlotDat3
Source sheet	Data	0.3	175.059	1	158.674	6.00304
Plot name	Average2	95.7	175.059	2	159.998	3.65045
Plot Type	15			3	161.44	3.36409
1st free col	8			4	163.452	3.22794
Sigma Level	1			5	164.135	6.87147
Absolute Errs	TRUE			6	164.221	1.81604
Symbol Type	1			7	165.17	1.63072
Inverse Plot	FALSE			8	165.277	2.95348
Color Plot	TRUE			9	165.923	2.57175
3D plot	FALSE			10	166.878	1.10375
Linear	FALSE			11	167.405	3.12323
Data Range	R180:S274			12	168.128	2.50591
Filled Symbols	FALSE			13	168.219	9.76333
ConcAge	FALSE			14	168.708	1.66519
ConcSwap	FALSE			15	168.818	1.66627
1st Symbol-row	1			16	169.054	2.81987
				17	169.076	1.66878
				18	169.603	1.67391
				19	169.757	4.59062
				20	170.036	2.63466
				21	170.125	2.6864
				22	170.247	6.55272
				23	170.846	3.01797
				24	171.263	2.36611
				25	171.326	1.6907
				26	171.491	3.36767
				27	172.027	2.95368
				28	172.627	5.00789
				29	173.148	4.03191
				30	173.187	2.75118
				31	173.25	2.63252
				32	173.286	2.99212
				33	173.514	3.50958
				34	173.526	4.16043
				35	173.554	1.71238
				36	173.592	3.57966
				37	173.744	4.57702
				38	173.752	1.92003
				39	174.164	5.51582
				40	174.166	3.62569
				41	174.227	4.40047
				42	174.25	4.7105
				43	174.27	5.46756
				44	174.305	2.57954
				45	174.448	4.92232
				46	174.497	2.56513
				47	174.565	2.13556
				48	174.628	2.13632
				49	174.779	4.7591
				50	175.167	4.26838
				51	175.416	5.01848
				52	175.464	1.73097
				53	175.531	3.37668
				54	175.672	1.733
				55	176.119	1.28564
				56	176.121	6.3414
				57	176.171	3.70164
				58	176.392	1.74
				59	176.869	3.31483
				60	176.972	4.32921
				61	177.172	1.92235
				62	177.181	3.35554
				63	177.488	2.66102
				64	177.896	0.87732
				65	177.995	1.7556
				66	178.368	9.60538
				67	178.573	3.7514
				68	179.325	2.86503
				69	179.37	4.28093
				70	179.636	1.98415
				71	179.712	5.37009
				72	179.788	3.33332
				73	180.083	3.87147
				74	180.092	4.01375
				75	180.628	3.90085
				76	180.739	6.64793
				77	180.842	2.8711
				78	181.112	5.53632
				79	181.473	5.24302
				80	181.64	2.54328
				81	181.912	2.1883
				82	182.036	1.65131
				83	182.702	2.91822
				84	182.861	2.12744
				85	182.957	2.27285
				86	183.366	3.39872
				87	183.431	4.72009
				88	183.444	1.60964
				89	184.403	8.16239
				90	187.259	3.89434
				91	187.576	1.77478
				92	187.886	2.24061
				93	188.857	5.47185
				94	191.08	2.20283
				95	199.18	3.45196
				IsoLine	IsoLine	IsoLine	IsoLine

## Sheet: PlotDat4
Source sheet	Data	100	0	100	0	100	0
Plot name	ProbDens2	102.941	0	150	0	1097.06	0
Plot Type	16	105.882	0	150	1
1st free col	9	108.824	0	100	1
Sigma Level	1	111.765	0	100	0
Absolute Errs	TRUE	114.706	0	ErrBox	ErrBox
Symbol Type	1	117.647	0	150	0
Inverse Plot	FALSE	120.588	1.58011e-08	200	0
Color Plot	TRUE	123.529	2.79477e-07	200	95
3D plot	FALSE	126.471	3.01735e-06	150	95
Linear	FALSE	129.412	2.18166e-05	150	0
Data Range	R179:S275	132.353	0.000104113	ErrBox	ErrBox
Filled Symbols	FALSE	135.294	0.00032671	950	0
ConcAge	FALSE	138.235	0.000674836	1000	0
ConcSwap	FALSE	141.176	0.000923812	1000	1
1st Symbol-row	1	144.118	0.000865258	950	1
		147.059	0.000643427	950	0
		150	0.000607311	ErrBox	ErrBox
		152.941	0.00103098
		155.882	0.00222292
		158.824	0.00440887
		161.765	0.00864873
		164.706	0.0180354
		167.647	0.0324626
		170.588	0.0428015
		173.529	0.051852
		176.471	0.0555199
		179.412	0.0403505
		182.353	0.0329117
		185.294	0.0186083
		188.235	0.0110752
		191.176	0.00582582
		194.118	0.00254156
		197.059	0.00162294
		200	0.00139622
		202.941	0.000746584
		205.882	0.000211225
		208.824	3.384e-05
		211.765	4.55709e-06
		214.706	9.08211e-07
		217.647	2.26811e-07
		220.588	5.46941e-08
		223.529	0
		226.471	0
		229.412	0
		232.353	0
		235.294	0
		238.235	0
		241.176	0
		244.118	0
		247.059	0
		250	0
		252.941	0
		255.882	0
		258.824	0
		261.765	0
		264.706	0
		267.647	0
		270.588	0
		273.529	0
		276.471	0
		279.412	0
		282.353	0
		285.294	0
		288.235	0
		291.176	0
		294.118	0
		297.059	0
		300	0
		302.941	0
		305.882	0
		308.824	0
		311.765	0
		314.706	0
		317.647	0
		320.588	0
		323.529	0
		326.471	0
		329.412	0
		332.353	0
		335.294	0
		338.235	0
		341.176	0
		344.118	0
		347.059	0
		350	0
		352.941	0
		355.882	0
		358.824	0
		361.765	0
		364.706	0
		367.647	0
		370.588	0
		373.529	0
		376.471	0
		379.412	0
		382.353	0
		385.294	0
		388.235	0
		391.176	0
		394.118	0
		397.059	0
		400	0
		402.941	0
		405.882	0
		408.824	0
		411.765	0
		414.706	0
		417.647	0
		420.588	0
		423.529	0
		426.471	0
		429.412	0
		432.353	0
		435.294	0
		438.235	0
		441.176	0
		444.118	0
		447.059	0
		450	0
		452.941	0
		455.882	0
		458.824	0
		461.765	0
		464.706	0
		467.647	0
		470.588	0
		473.529	0
		476.471	0
		479.412	0
		482.353	0
		485.294	0
		488.235	0
		491.176	0
		494.118	0
		497.059	0
		500	0
		502.941	0
		505.882	0
		508.824	0
		511.765	0
		514.706	0
		517.647	0
		520.588	0
		523.529	0
		526.471	0
		529.412	0
		532.353	0
		535.294	0
		538.235	0
		541.176	0
		544.118	0
		547.059	0
		550	0
		552.941	0
		555.882	0
		558.824	0
		561.765	0
		564.706	0
		567.647	0
		570.588	0
		573.529	0
		576.471	0
		579.412	0
		582.353	0
		585.294	0
		588.235	0
		591.176	0
		594.118	0
		597.059	0
		600	0
		602.941	0
		605.882	0
		608.824	0
		611.765	0
		614.706	0
		617.647	0
		620.588	0
		623.529	0
		626.471	0
		629.412	0
		632.353	0
		635.294	0
		638.235	0
		641.176	0
		644.118	0
		647.059	0
		650	0
		652.941	0
		655.882	0
		658.824	0
		661.765	0
		664.706	0
		667.647	0
		670.588	0
		673.529	0
		676.471	0
		679.412	0
		682.353	0
		685.294	0
		688.235	0
		691.176	0
		694.118	0
		697.059	0
		700	0
		702.941	0
		705.882	0
		708.824	0
		711.765	0
		714.706	0
		717.647	0
		720.588	0
		723.529	0
		726.471	0
		729.412	0
		732.353	0
		735.294	0
		738.235	0
		741.176	0
		744.118	0
		747.059	0
		750	0
		752.941	0
		755.882	0
		758.824	0
		761.765	0
		764.706	0
		767.647	0
		770.588	0
		773.529	0
		776.471	0
		779.412	0
		782.353	0
		785.294	0
		788.235	0
		791.176	0
		794.118	0
		797.059	0
		800	0
		802.941	0
		805.882	0
		808.824	0
		811.765	0
		814.706	0
		817.647	0
		820.588	0
		823.529	0
		826.471	0
		829.412	0
		832.353	0
		835.294	0
		838.235	0
		841.176	0
		844.118	0
		847.059	0
		850	0
		852.941	0
		855.882	0
		858.824	0
		861.765	0
		864.706	0
		867.647	0
		870.588	0
		873.529	0
		876.471	1.69181e-08
		879.412	3.12025e-08
		882.353	5.6372e-08
		885.294	9.97639e-08
		888.235	1.7295e-07
		891.176	2.93699e-07
		894.118	4.88565e-07
		897.059	7.96119e-07
		900	1.27078e-06
		902.941	1.987e-06
		905.882	3.04343e-06
		908.824	4.56631e-06
		911.765	6.71124e-06
		914.706	9.66222e-06
		917.647	1.36266e-05
		920.588	1.8825e-05
		923.529	2.54752e-05
		926.471	3.37705e-05
		929.412	4.38524e-05
		932.353	5.57809e-05
		935.294	6.95048e-05
		938.235	8.48359e-05
		941.176	0.000101434
		944.118	0.000118801
		947.059	0.000136299
		950	0.000153181
		952.941	0.000168637
		955.882	0.000181859
		958.824	0.000192113
		961.765	0.000198798
		964.706	0.000201514
		967.647	0.000200094
		970.588	0.000194625
		973.529	0.000185439
		976.471	0.000173077
		979.412	0.000158239
		982.353	0.000141718
		985.294	0.000124329
		988.235	0.000106846
		991.176	8.99452e-05
		994.118	7.41711e-05
		997.059	5.99139e-05
		1000	4.74086e-05
		1002.94	3.67471e-05
		1005.88	2.79014e-05
		1008.82	2.07522e-05
		1011.76	1.51196e-05
		1014.71	1.07907e-05
		1017.65	7.54394e-06
		1020.59	5.16634e-06
		1023.53	3.4658e-06
		1026.47	2.27751e-06
		1029.41	1.46607e-06
		1032.35	9.24451e-07
		1035.29	5.71018e-07
		1038.24	3.45504e-07
		1041.18	2.04782e-07
		1044.12	1.18896e-07
		1047.06	6.76206e-08
		1050	3.76727e-08
		1052.94	2.05595e-08
		1055.88	1.09909e-08
		1058.82	0
		1061.76	0
		1064.71	0
		1067.65	0
		1070.59	0
		1073.53	0
		1076.47	0
		1079.41	0
		1082.35	0
		1085.29	0
		1088.24	0
		1091.18	0
		1094.12	0
		1097.06	0
		IsoLine	IsoLine

## Sheet: PlotDat5
Source sheet	Data	120	0	140	0	120	0
Plot name	ProbDens3	120.265	1.1361e-08	160	0	209.735	0
Plot Type	16	120.529	1.4973e-08	160	3
1st free col	9	120.794	1.96662e-08	140	3
Sigma Level	1	121.059	2.57423e-08	140	0
Absolute Errs	TRUE	121.324	3.3581e-08	ErrBox	ErrBox
Symbol Type	1	121.588	4.36572e-08	160	0
Inverse Plot	FALSE	121.853	5.65634e-08	180	0
Color Plot	TRUE	122.118	7.30352e-08	180	70
3D plot	FALSE	122.382	9.39823e-08	160	70
Linear	FALSE	122.647	1.20525e-07	160	0
Data Range	R179:S274	122.912	1.54037e-07	ErrBox	ErrBox
Filled Symbols	FALSE	123.176	1.96196e-07	180	0
ConcAge	FALSE	123.441	2.60565e-07	200	0
ConcSwap	FALSE	123.706	3.28089e-07	200	23
1st Symbol-row	1	123.971	4.11937e-07	180	23
		124.235	5.15704e-07	180	0
		124.5	6.43687e-07	ErrBox	ErrBox
		124.765	8.0099e-07
		125.029	9.93661e-07
		125.294	1.22883e-06
		125.559	1.51484e-06
		125.824	1.86146e-06
		126.088	2.28004e-06
		126.353	2.78369e-06
		126.618	3.3875e-06
		126.882	4.10878e-06
		127.147	4.9672e-06
		127.412	5.98512e-06
		127.676	7.1877e-06
		127.941	8.60317e-06
		128.206	1.0263e-05
		128.471	1.22022e-05
		128.735	1.44591e-05
		129	1.70758e-05
		129.265	2.00984e-05
		129.529	2.35763e-05
		129.794	2.75628e-05
		130.059	3.21146e-05
		130.324	3.72917e-05
		130.588	4.31691e-05
		130.853	4.97906e-05
		131.118	5.72335e-05
		131.382	6.55662e-05
		131.647	7.48576e-05
		131.912	8.51761e-05
		132.176	9.66007e-05
		132.441	0.000109173
		132.706	0.000122964
		132.971	0.000138027
		133.235	0.00015441
		133.5	0.000172152
		133.765	0.000191281
		134.029	0.000211816
		134.294	0.000233772
		134.559	0.000257116
		134.824	0.000281834
		135.088	0.000307882
		135.353	0.000335199
		135.618	0.000363704
		135.882	0.000393299
		136.147	0.000423865
		136.412	0.000455263
		136.676	0.000487336
		136.941	0.000519911
		137.206	0.000552796
		137.471	0.000585784
		137.735	0.000618656
		138	0.000651183
		138.265	0.000683127
		138.529	0.000714246
		138.794	0.000744296
		139.059	0.000773037
		139.324	0.000800231
		139.588	0.000825664
		139.853	0.000849101
		140.118	0.000870355
		140.382	0.000889249
		140.647	0.000905627
		140.912	0.000919362
		141.176	0.000930353
		141.441	0.000938529
		141.706	0.000943853
		141.971	0.00094632
		142.235	0.000945957
		142.5	0.000942837
		142.765	0.000937036
		143.029	0.000928687
		143.294	0.000917947
		143.559	0.000904999
		143.824	0.000890053
		144.088	0.000873339
		144.353	0.000855109
		144.618	0.00083563
		144.882	0.00081518
		145.147	0.000794049
		145.412	0.000772545
		145.676	0.00075094
		145.941	0.000729539
		146.206	0.000708635
		146.471	0.000688521
		146.735	0.000669466
		147	0.000651721
		147.265	0.000635549
		147.529	0.00062119
		147.794	0.000608869
		148.059	0.000598827
		148.324	0.000591231
		148.588	0.000586281
		148.853	0.000584154
		149.118	0.000585014
		149.382	0.000589032
		149.647	0.000596381
		149.912	0.000607202
		150.176	0.000621667
		150.441	0.000639942
		150.706	0.000662201
		150.971	0.00068864
		151.235	0.000719449
		151.5	0.000754824
		151.765	0.00079501
		152.029	0.000840251
		152.294	0.000890789
		152.559	0.000946876
		152.824	0.00100881
		153.088	0.00107687
		153.353	0.00115138
		153.618	0.00123261
		153.882	0.00132085
		154.147	0.00141638
		154.412	0.00151947
		154.676	0.00163034
		154.941	0.00174922
		155.206	0.00187624
		155.471	0.00201157
		155.735	0.00215522
		156	0.00230726
		156.265	0.00246766
		156.529	0.00263635
		156.794	0.00281324
		157.059	0.00299819
		157.324	0.00319111
		157.588	0.00339193
		157.853	0.0036007
		158.118	0.0038176
		158.382	0.00404307
		158.647	0.00427784
		158.912	0.0045231
		159.176	0.00478049
		159.441	0.00505235
		159.706	0.00534167
		159.971	0.0056522
		160.235	0.00598845
		160.5	0.00635558
		160.765	0.00675924
		161.029	0.00720528
		161.294	0.00769923
		161.559	0.00824595
		161.824	0.00884892
		162.088	0.0095096
		162.353	0.0102269
		162.618	0.0109969
		162.882	0.0118128
		163.147	0.012666
		163.412	0.0135469
		163.676	0.0144475
		163.941	0.0153642
		164.206	0.0162997
		164.471	0.017265
		164.735	0.0182788
		165	0.0193635
		165.265	0.0205396
		165.529	0.0218174
		165.794	0.0231906
		166.059	0.0246342
		166.324	0.0261076
		166.588	0.0275642
		166.853	0.0289638
		167.118	0.0302833
		167.382	0.0315206
		167.647	0.0326925
		167.912	0.0338239
		168.176	0.0349371
		168.441	0.0360419
		168.706	0.0371328
		168.971	0.0381915
		169.235	0.0391942
		169.5	0.0401205
		169.765	0.0409596
		170.029	0.0417137
		170.294	0.0423977
		170.559	0.0430354
		170.824	0.0436551
		171.088	0.044285
		171.353	0.0449487
		171.618	0.045663
		171.882	0.0464366
		172.147	0.0472704
		172.412	0.0481588
		172.676	0.0490909
		172.941	0.0500531
		173.206	0.0510298
		173.471	0.0520045
		173.735	0.0529596
		174	0.053875
		174.265	0.0547271
		174.529	0.0554867
		174.794	0.0561203
		175.059	0.056592
		175.324	0.056871
		175.588	0.0569403
		175.853	0.0568057
		176.118	0.0564996
		176.382	0.056073
		176.647	0.0555737
		176.912	0.0550169
		177.176	0.054364
		177.441	0.0535255
		177.706	0.0523965
		177.971	0.050912
		178.235	0.0490917
		178.5	0.0470493
		178.765	0.0449591
		179.029	0.042998
		179.294	0.0412939
		179.559	0.0399026
		179.824	0.038814
		180.088	0.0379775
		180.353	0.0373268
		180.618	0.0367979
		180.882	0.0363353
		181.147	0.0358927
		181.412	0.0354299
		181.676	0.0349121
		181.941	0.0343089
		182.206	0.0335955
		182.471	0.0327542
		182.735	0.0317759
		183	0.0306608
		183.265	0.0294195
		183.529	0.0280717
		183.794	0.0266452
		184.059	0.0251734
		184.324	0.0236931
		184.588	0.0222407
		184.853	0.0208498
		185.118	0.019548
		185.382	0.0183556
		185.647	0.0172836
		185.912	0.0163345
		186.176	0.015502
		186.441	0.0147734
		186.706	0.014131
		186.971	0.0135547
		187.235	0.0130241
		187.5	0.0125207
		187.765	0.0120293
		188.029	0.0115388
		188.294	0.0110427
		188.559	0.0105386
		188.824	0.0100279
		189.088	0.00951414
		189.353	0.00900254
		189.618	0.00849852
		189.882	0.00800701
		190.147	0.00753182
		190.412	0.00707537
		190.676	0.00663873
		190.941	0.0062218
		191.206	0.00582373
		191.471	0.00544325
		191.735	0.00507917
		192	0.00473064
		192.265	0.00439731
		192.529	0.00407943
		192.794	0.00377782
		193.059	0.00349368
		193.324	0.00322844
		193.588	0.00298355
		193.853	0.0027603
		194.118	0.00255955
		194.382	0.0023818
		194.647	0.00222695
		194.912	0.0020944
		195.176	0.00198304
		195.441	0.00189132
		195.706	0.00181735
		195.971	0.00175903
		196.235	0.00171407
		196.5	0.00168011
		196.765	0.00165489
		197.029	0.0016362
		197.294	0.00162197
		197.559	0.0016103
		197.824	0.00159952
		198.088	0.00158818
		198.353	0.00157502
		198.618	0.00155904
		198.882	0.0015394
		199.147	0.00151552
		199.412	0.00148697
		199.676	0.00145359
		199.941	0.00141527
		200.206	0.00137215
		200.471	0.00132445
		200.735	0.00127254
		201	0.00121688
		201.265	0.00115801
		201.529	0.00109654
		201.794	0.00103311
		202.059	0.000968395
		202.324	0.00090307
		202.588	0.000837783
		202.853	0.000773161
		203.118	0.000709784
		203.382	0.000648181
		203.647	0.000588813
		203.912	0.000532076
		204.176	0.000478287
		204.441	0.000427696
		204.706	0.000380474
		204.971	0.000336728
		205.235	0.000296487
		205.5	0.000259755
		205.765	0.00022645
		206.029	0.000196431
		206.294	0.000169614
		206.559	0.000145776
		206.824	0.00012474
		207.088	0.000106284
		207.353	9.01821e-05
		207.618	7.62363e-05
		207.882	6.42187e-05
		208.147	5.39206e-05
		208.412	4.51436e-05
		208.676	3.77014e-05
		208.941	3.14217e-05
		209.206	2.61473e-05
		209.471	2.17359e-05
		209.735	1.80606e-05
		IsoLine	IsoLine

## Sheet: Data
Supplemental Table S4. U-Pb geochronologic analyses of Jurassic and Lower Cretaceous Sandstones adjacent to Coahuila Block, Durango, Mexico (from Lawton and Molina-Garza, 2014).
							Isotope ratios						Apparent ages (Ma)
Analysis	U	206Pb	U/Th	206Pb*	±	207Pb*	±	206Pb*	±	error	206Pb*	±	207Pb*	±	206Pb*	±	Best age	±	Conc
	(ppm)	204Pb		207Pb*	(%)	235U*	(%)	238U	(%)	corr.	238U*	(Ma)	235U	(Ma)	207Pb*	(Ma)	(Ma)	(Ma)	(%)
08NR01 La Casita Formation, near Los Angeles, Coahuila 13R 641109 2823626 (103° 35.76’W 25° 31.49’N)
08NR01-3	118.271	3644	1.0731	20.4566	10.1166	0.149903	10.6197	0.0222404	3.23	0.304152	141.8	4.53013	141.826	14.0578	142.248	237.936	141.8	4.53013	NA
08NR01-67	72.2697	1808	2.115	20.2968	16.0386	0.169284	16.4895	0.0249198	3.83	0.232268	158.674	6.00304	158.798	24.2448	160.616	377.224	158.674	6.00304	NA
08NR01-87	126.076	3524	2.39226	21.3966	10.1551	0.16194	10.4145	0.0251302	2.31	0.221806	159.998	3.65045	152.4	14.739	35.7604	243.636	159.998	3.65045	NA
08NR01-83	52.9699	1288	1.49775	20.1539	29.0721	0.173494	29.1486	0.0253597	2.11	0.0723877	161.44	3.36409	162.447	43.7845	177.121	690.818	161.44	3.36409	NA
08NR01-58	127.001	4288	2.56773	20.8505	10.965	0.169814	11.1459	0.0256796	2	0.179438	163.452	3.22794	159.258	16.4301	97.3022	260.154	163.452	3.22794	NA
08NR01-66	88.6096	2128	1.76665	23.3899	15.8284	0.152019	16.3864	0.0257883	4.24	0.25875	164.135	6.87147	143.693	21.9594	-181.917	397.219	164.135	6.87147	NA
08NR01-73	227.361	5432	1.94405	19.9398	8.09368	0.178416	8.17081	0.025802	1.12	0.137073	164.221	1.81604	166.696	12.5618	201.97	188.153	164.221	1.81604	NA
08NR01-95	191.865	5292	2.04288	20.1952	11.9118	0.177191	11.9537	0.0259531	1	0.083656	165.17	1.63072	165.641	18.2715	172.349	278.878	165.17	1.63072	NA
08NR01-88	455.031	12556	2.78902	20.3732	2.40576	0.175758	3.01061	0.02597	1.81	0.601206	165.277	2.95348	164.404	4.56967	151.829	56.3704	165.277	2.95348	NA
08NR01-47	80.3589	3512	2.89264	21.1316	13.1477	0.170121	13.2411	0.0260729	1.57	0.11857	165.923	2.57175	159.524	19.5495	65.5074	314.175	165.923	2.57175	NA
08NR01-5	131.7	1552	0.785599	18.8781	18.4465	0.191538	18.4586	0.0262249	0.670012	0.0362981	166.878	1.10375	177.941	30.1373	327.545	421.801	166.878	1.10375	NA
08NR01-93	84.0432	2184	2.43783	20.8141	9.51621	0.174279	9.70208	0.0263088	1.89	0.194804	167.405	3.12323	163.126	14.6217	101.433	225.459	167.405	3.12323	NA
08NR01-62	323.422	11764	2.39181	19.9512	2.86958	0.182613	3.24262	0.0264239	1.51	0.465672	168.128	2.50591	170.306	5.08415	200.651	66.6434	168.128	2.50591	NA
08NR01-84	82.6018	2352	2.4952	23.8205	16.0248	0.153033	17.0695	0.0264384	5.88	0.344473	168.219	9.76333	144.586	23.0075	-227.722	405.862	168.219	9.76333	NA
08NR01-92	175.855	3844	2.46421	19.6457	12.3481	0.186099	12.3885	0.0265162	1	0.0807198	168.708	1.66519	173.295	19.7391	236.354	285.785	168.708	1.66519	NA
08NR01-68	195.199	4296	1.83301	20.1261	6.03548	0.181778	6.11777	0.0265338	1	0.163458	168.818	1.66627	169.589	9.55521	180.336	140.773	168.818	1.66627	NA
08NR01-33	82.2797	3104	2.39333	19.9025	9.46889	0.18408	9.61853	0.0265714	1.69	0.175703	169.054	2.81987	171.566	15.1844	206.32	220.041	169.054	2.81987	NA
08NR01-81	233.468	6864	3.55074	20.6608	2.84644	0.177348	3.01699	0.026575	1	0.331456	169.076	1.66878	165.776	4.61454	118.885	67.1079	169.076	1.66878	NA
08NR01-74	153.188	3000	2.21477	20.3789	10.4996	0.180369	10.5471	0.0266588	1	0.094813	169.603	1.67391	168.378	16.3661	151.176	246.58	169.603	1.67391	NA
08NR01-13	137.759	5396	2.6355	19.8585	3.38039	0.185266	4.35139	0.0266833	2.74	0.629684	169.757	4.59062	172.582	6.90628	211.454	78.3563	169.757	4.59062	NA
08NR01-86	274.158	8452	2.84145	20.7338	4.75214	0.17774	5.00477	0.0267278	1.57	0.313701	170.036	2.63466	166.114	7.66934	110.563	112.237	170.036	2.63466	NA
08NR01-72	1089.11	19760	1.08305	19.8869	1.3731	0.185407	2.10841	0.026742	1.6	0.758866	170.125	2.6864	172.703	3.34847	208.134	31.8413	170.125	2.6864	NA
08NR01-23	169.481	2156	1.11742	14.454	26.0412	0.255282	26.3316	0.0267613	3.9	0.148111	170.247	6.55272	230.858	54.4254	904.237	545.589	170.247	6.55272	NA
08NR01-78	148.941	5528	2.14258	22.1614	12.9821	0.167093	13.1049	0.0268568	1.79	0.13659	170.846	3.01797	156.893	19.0532	-48.9811	316.958	170.846	3.01797	NA
08NR01-69	107.513	2808	1.99879	21.1644	16.2137	0.175397	16.2741	0.0269232	1.4	0.0860264	171.263	2.36611	164.092	24.6632	61.8178	388.436	171.263	2.36611	NA
08NR01-77	152.374	4688	2.86994	21.2749	6.85618	0.174552	6.92872	0.0269333	1	0.144327	171.326	1.6907	163.361	10.4556	49.3969	163.875	171.326	1.6907	NA
08NR01-82	571.677	17552	3.0849	20.1104	2.36429	0.184839	3.09031	0.0269595	1.99	0.643949	171.491	3.36767	172.216	4.89518	182.165	55.0908	171.491	3.36767	NA
08NR01-56	97.0111	2436	1.12373	19.9824	12.8275	0.186612	12.9449	0.0270449	1.74	0.134415	172.027	2.95368	173.734	20.6738	197.016	299.086	172.027	2.95368	NA
08NR01-10	245.495	7852	2.19449	20.4533	6.34732	0.18296	6.99515	0.0271406	2.94	0.420291	172.627	5.00789	170.605	10.9858	142.625	149.091	172.627	5.00789	NA
08NR01-16	122.245	5240	2.60061	20.6495	7.71183	0.181777	8.06485	0.0272236	2.36	0.292628	173.148	4.03191	169.588	12.5966	120.181	181.947	173.148	4.03191	NA
08NR01-59	118.89	5060	2.47951	20.523	8.88335	0.182938	9.02807	0.0272297	1.61	0.178333	173.187	2.75118	170.586	14.1774	134.641	209.128	173.187	2.75118	NA
08NR01-91	191.843	6024	3.29725	21.496	8.94521	0.174722	9.07681	0.0272398	1.54	0.169663	173.25	2.63252	163.509	13.7089	24.6511	214.952	173.25	2.63252	NA
08NR01-1	29.0258	1356	1.92229	21.4437	28.3116	0.175184	28.3657	0.0272455	1.75001	0.0616945	173.286	2.99212	163.908	42.9607	30.4837	690.449	173.286	2.99212	NA
08NR01-65	227.384	9824	1.49114	19.7925	2.99168	0.190053	3.62666	0.0272818	2.05	0.565259	173.514	3.50958	176.674	5.88097	219.16	69.2455	173.514	3.50958	NA
08NR01-42	136.243	6572	2.10394	20.2342	4.72048	0.185917	5.30922	0.0272838	2.43	0.457695	173.526	4.16043	173.14	8.45154	167.841	110.321	173.526	4.16043	NA
08NR01-85	357.849	13180	5.14621	20.0178	1.9587	0.187957	2.19921	0.0272882	1	0.454709	173.554	1.71238	174.885	3.5331	192.9	45.5491	173.554	1.71238	NA
08NR01-32	208.498	7060	2.32187	19.9841	3.81505	0.188317	4.35002	0.0272943	2.09	0.480458	173.592	3.57966	175.192	6.99979	196.823	88.6743	173.592	3.57966	NA
08NR01-24	107.489	3672	2.12284	20.0038	7.39505	0.188299	7.8623	0.0273186	2.67	0.339595	173.744	4.57702	175.177	12.651	194.531	172.105	173.744	4.57702	NA
08NR01-45	178.837	5676	2.52268	20.2546	5.95021	0.185975	6.0547	0.0273198	1.12	0.18498	173.752	1.92003	173.189	9.64085	165.487	139.161	173.752	1.92003	NA
08NR01-60	107.456	4920	2.02611	20.843	9.68683	0.18116	10.2048	0.0273854	3.21	0.314557	174.164	5.51582	169.058	15.8937	98.1535	229.679	174.164	5.51582	NA
08NR01-79	103.035	2724	2.07042	20.4912	6.29256	0.184271	6.6369	0.0273857	2.11	0.31792	174.166	3.62569	171.729	10.4862	138.281	147.909	174.166	3.62569	NA
08NR01-49	82.5435	4844	1.89434	20.1827	6.43312	0.187155	6.92377	0.0273955	2.56	0.369741	174.227	4.40047	174.199	11.0837	173.796	150.244	174.227	4.40047	NA
08NR01-57	194.492	8772	1.83854	20.1017	4.79614	0.187935	5.52364	0.0273992	2.74	0.49605	174.25	4.7105	174.865	8.8732	183.171	111.777	174.25	4.7105	NA
08NR01-39	44.2353	1900	1.2486	19.3404	14.6438	0.195355	14.9851	0.0274024	3.18	0.212211	174.27	5.46756	181.188	24.8716	272.373	337.192	174.27	5.46756	NA
08NR01-100	151.163	4952	2.24915	21.0144	10.1694	0.179829	10.2794	0.0274079	1.5	0.145923	174.305	2.57954	167.913	15.9102	78.7346	242.04	174.305	2.57954	NA
08NR01-54	68.7766	3124	2.83718	20.6037	14.0858	0.183567	14.3732	0.0274308	2.86	0.198982	174.448	4.92232	171.125	22.639	125.41	333.018	174.448	4.92232	NA
08NR01-2	247.457	2036	1.42661	14.9914	11.0263	0.252359	11.1266	0.0274385	1.49	0.133914	174.497	2.56513	228.49	22.7695	828.552	230.637	174.497	2.56513	NA
08NR01-18	103.697	4416	1.61779	20.9576	10.4973	0.180589	10.5703	0.0274493	1.24	0.11731	174.565	2.13556	168.567	16.419	85.1586	249.564	174.565	2.13556	NA
08NR01-63	95.0903	3872	1.6845	19.8699	7.78459	0.190544	7.88273	0.0274593	1.24	0.157306	174.628	2.13632	177.093	12.8109	210.116	180.68	174.628	2.13632	NA
08NR01-50	155.854	5268	2.46571	20.5305	8.07224	0.184575	8.53104	0.0274835	2.76	0.323524	174.779	4.7591	171.99	13.498	133.774	190.018	174.779	4.7591	NA
08NR01-44	75.6436	2796	2.14699	20.2663	12.074	0.187402	12.3241	0.0275454	2.47	0.20042	175.167	4.26838	174.41	19.7522	164.133	283.125	175.167	4.26838	NA
08NR01-26	105.881	3764	1.92478	19.4968	5.23937	0.195079	5.98841	0.027585	2.9	0.484269	175.416	5.01848	180.954	9.92589	253.882	120.558	175.416	5.01848	NA
08NR01-80	117.922	4328	1.97724	18.8539	11.4935	0.201787	11.5369	0.0275927	1	0.0866781	175.464	1.73097	186.637	19.6717	330.464	261.461	175.464	1.73097	NA
08NR01-35	128.724	4584	2.18993	20.4559	9.32475	0.186056	9.52646	0.0276034	1.95	0.204693	175.531	3.37668	173.259	15.1751	142.323	219.247	175.531	3.37668	NA
08NR01-70	148.071	3608	0.789758	22.1072	11.009	0.172299	11.0544	0.0276258	1	0.0904621	175.672	1.733	161.412	16.4985	-43.0539	268.213	175.672	1.733	NA
08NR01-15	566.255	23844	1.18575	20.1238	2.17192	0.189769	2.29453	0.0276971	0.74	0.322507	176.119	1.28564	176.432	3.71611	180.612	50.6218	176.119	1.28564	NA
08NR01-48	110.456	5476	2.85282	20.2272	6.92899	0.188801	7.83157	0.0276974	3.65	0.466063	176.121	6.3414	175.606	12.6298	168.654	162.002	176.121	6.3414	NA
08NR01-71	221.133	6724	1.64831	20.156	3.96434	0.189523	4.50032	0.0277054	2.13	0.4733	176.171	3.70164	176.222	7.28064	176.879	92.4846	176.171	3.70164	NA
08NR01-98	143.868	4180	1.72566	21.297	8.57793	0.179597	8.63602	0.0277405	1	0.115794	176.392	1.74	167.713	13.3516	46.9179	205.234	176.392	1.74	NA
08NR01-61	114.191	4472	1.47565	19.9318	5.96711	0.192424	6.2623	0.0278167	1.9	0.303403	176.869	3.31483	178.696	10.2614	202.903	138.604	176.869	3.31483	NA
08NR01-29	110.176	2048	3.18337	18.8113	8.71952	0.204007	9.06534	0.0278331	2.48	0.27357	176.972	4.32921	188.511	15.5978	335.594	197.931	176.972	4.32921	NA
08NR01-31	167.296	6132	2.45472	20.0685	5.8302	0.191445	5.93306	0.027865	1.1	0.185402	177.172	1.92235	177.862	9.68039	187.017	135.813	177.172	1.92235	NA
08NR01-28	208.383	9760	1.64168	20.0013	3.99508	0.192098	4.4325	0.0278664	1.92	0.433164	177.181	3.35554	178.418	7.25266	194.821	92.8953	177.181	3.35554	NA
08NR01-34	650.25	9936	3.27934	19.8003	3.11523	0.194389	3.46627	0.0279154	1.52	0.438511	177.488	2.66102	180.368	5.72828	218.245	72.1184	177.488	2.66102	NA
08NR01-11	115.691	5152	2.62507	20.3862	7.15646	0.189243	7.17391	0.0279804	0.500001	0.0696972	177.896	0.87732	175.983	11.5919	150.332	167.895	177.896	0.87732	NA
08NR01-94	453.974	10772	1.92509	20.0723	2.03726	0.19231	2.26946	0.0279962	1	0.440634	177.995	1.7556	178.598	3.71678	186.571	47.431	177.995	1.7556	NA
08NR01-6	141.23	6708	2.43735	20.3983	6.28814	0.189639	8.3278	0.0280556	5.46	0.655635	178.368	9.60538	176.321	13.4803	148.943	147.526	178.368	9.60538	NA
08NR01-97	96.422	2720	1.91577	21.8714	32.4667	0.177072	32.5365	0.0280884	2.13	0.0654649	178.573	3.7514	165.538	49.7388	-17.01	803.523	178.573	3.7514	NA
08NR01-9	312.376	9500	1.95785	20.2345	3.80932	0.192214	4.13948	0.0282083	1.62	0.391353	179.325	2.86503	178.517	6.77663	167.81	89.0133	179.325	2.86503	NA
08NR01-4	322.103	6924	0.875467	20.0662	4.84382	0.193876	5.4147	0.0282155	2.42	0.446932	179.37	4.28093	179.931	8.92853	187.28	112.804	179.37	4.28093	NA
08NR01-12	58.9832	3116	1.8569	22.3574	21.1496	0.174269	21.1792	0.0282579	1.12	0.0528821	179.636	1.98415	163.117	31.9253	-70.4305	521.608	179.636	1.98415	NA
08NR01-51	292.814	10092	1.52458	20.4282	4.15354	0.190809	5.14128	0.0282701	3.03	0.589347	179.712	5.37009	177.319	8.36503	145.505	97.4617	179.712	5.37009	NA
08NR01-27	70.7139	3012	2.19547	19.5219	8.07379	0.199752	8.28978	0.0282822	1.88	0.226785	179.788	3.33332	184.917	14.0152	250.924	186.028	179.788	3.33332	NA
08NR01-64	71.0189	4112	1.75369	20.8988	11.6996	0.186902	11.901	0.0283292	2.18	0.183179	180.083	3.87147	173.982	19.031	91.8166	277.986	180.083	3.87147	NA
08NR01-38	200.263	9368	1.4516	20.6522	6.16851	0.189143	6.56949	0.0283306	2.26	0.344015	180.092	4.01375	175.898	10.6104	119.862	145.492	180.092	4.01375	NA
08NR01-46	87.3743	3628	1.83792	20.3356	10.9463	0.192669	11.1632	0.0284162	2.19	0.196181	180.628	3.90085	178.904	18.3129	156.158	256.89	180.628	3.90085	NA
08NR01-53	136.259	7744	2.91196	20.8007	7.2149	0.188477	8.12205	0.0284338	3.73	0.459244	180.739	6.64793	175.329	13.0794	102.952	170.74	180.739	6.64793	NA
08NR01-17	219.52	9756	1.54054	20.1365	2.84739	0.194807	3.27105	0.0284504	1.61	0.492197	180.842	2.8711	180.722	5.41536	179.132	66.389	180.842	2.8711	NA
08NR01-52	105.56	5152	1.9877	20.3431	7.02943	0.19312	7.68264	0.0284933	3.1	0.403507	181.112	5.53632	179.288	12.6272	155.292	164.75	181.112	5.53632	NA
08NR01-36	58.8843	3528	2.66575	22.2654	18.0489	0.176804	18.2852	0.028551	2.93	0.160239	181.473	5.24302	165.307	27.9014	-60.4118	443.117	181.473	5.24302	NA
08NR01-55	94.3154	4732	2.02174	20.189	8.49022	0.195169	8.60814	0.0285776	1.42	0.16496	181.64	2.54328	181.03	14.2741	173.06	198.446	181.64	2.54328	NA
08NR01-76	1547.99	32896	1.09476	19.7217	1.67143	0.200098	2.06932	0.028621	1.22	0.589567	181.912	2.1883	185.209	3.50335	227.449	38.6246	181.912	2.1883	NA
08NR01-8	264.077	9656	2.15003	20.3171	4.99898	0.194368	5.08293	0.0286409	0.92	0.180998	182.036	1.65131	180.35	8.39925	158.278	117.042	182.036	1.65131	NA
08NR01-99	117.702	3188	2.0117	21.7014	8.12212	0.182645	8.2821	0.0287471	1.62	0.195603	182.702	2.91822	170.334	12.9881	1.77967	195.959	182.702	2.91822	NA
08NR01-25	111.297	4872	2.12563	20.6243	9.33776	0.192353	9.41202	0.0287724	1.18	0.125372	182.861	2.12744	178.635	15.4184	123.052	220.326	182.861	2.12744	NA
08NR01-14	117.884	5772	2.39718	19.7087	4.44094	0.201396	4.61623	0.0287878	1.26	0.27295	182.957	2.27285	186.307	7.85762	228.97	102.63	182.957	2.27285	NA
08NR01-21	58.3897	2564	2.11265	21.113	18.3625	0.188427	18.4585	0.0288531	1.88	0.10185	183.366	3.39872	175.286	29.7249	67.6056	440.149	183.366	3.39872	NA
08NR01-43	213.477	11048	1.70112	20.105	4.70669	0.197946	5.38192	0.0288635	2.61	0.484957	183.431	4.72009	183.387	9.02999	182.785	109.699	183.431	4.72009	NA
08NR01-22	221.506	8880	1.41112	20.2834	5.77654	0.196219	5.8447	0.0288655	0.89	0.152275	183.444	1.60964	181.922	9.73498	162.167	135.176	183.444	1.60964	NA
08NR01-40	57.252	2608	2.44426	19.626	10.3142	0.203867	11.2491	0.0290186	4.49	0.399142	184.403	8.16239	188.393	19.345	238.68	238.39	184.403	8.16239	NA
08NR01-37	340.594	13368	2.07953	19.8826	2.11534	0.204398	2.98777	0.0294746	2.11	0.706212	187.259	3.89434	188.841	5.14859	208.641	49.0518	187.259	3.89434	NA
08NR01-20	111.322	4636	1.80903	20.4803	9.22921	0.198773	9.27901	0.0295251	0.96	0.103459	187.576	1.77478	184.087	15.6238	139.531	217.093	187.576	1.77478	NA
08NR01-30	134.487	2692	1.93493	17.7092	7.02098	0.230263	7.12448	0.0295747	1.21	0.169837	187.886	2.24061	210.416	13.5405	470.792	155.557	187.886	2.24061	NA
08NR01-41	93.829	4280	1.76444	19.4383	5.33507	0.21088	6.09152	0.0297298	2.94	0.482638	188.857	5.47185	194.29	10.7722	260.79	122.61	188.857	5.47185	NA
08NR01-89	416.607	14264	2.94132	19.9872	1.77888	0.207539	2.12916	0.030085	1.17	0.549513	191.08	2.20283	191.485	3.71568	196.46	41.34	191.08	2.20283	NA
08NR01-19	310.496	14624	3.20686	20.1887	9.62108	0.214312	9.78074	0.0313801	1.76	0.179946	199.18	3.45196	197.165	17.5292	173.102	224.975	199.18	3.45196	NA
08NR01-96	152.099	27136	1.13835	14.031	1.00267	1.60705	1.46637	0.163537	1.07	0.729692	976.403	9.69479	972.958	9.17837	965.169	20.4725	965.169	20.4725	101.164
08NR03 La Casita Formation 13R 640377 2824336 (103° 36.20’W 25° 31.88’N)
08NR03-40	155.587	6264	0.939049	20.9696	4.53788	0.173572	4.6322	0.0263978	0.93	0.200769	167.964	1.54189	162.514	6.95653	83.8027	107.699	167.964	1.54189	NA
08NR03-42	196.086	7516	1.44216	21.116	5.701	0.174749	6.16254	0.0267624	2.34	0.379713	170.253	3.93178	163.532	9.30832	67.2682	135.778	170.253	3.93178	NA
08NR03-100	143.133	5708	2.37334	21.5382	7.35984	0.171509	7.99776	0.0267914	3.13	0.39136	170.435	5.26472	160.728	11.8894	19.9388	176.912	170.435	5.26472	NA
08NR03-20	269.149	10156	2.12024	20.6556	5.12244	0.178921	5.55535	0.0268038	2.15	0.387015	170.513	3.61798	167.131	8.56106	119.483	120.8	170.513	3.61798	NA
08NR03-89	513.554	14164	1.25157	19.7771	2.58496	0.187693	3.01406	0.0269221	1.55	0.514257	171.256	2.61952	174.659	4.83647	220.963	59.809	171.256	2.61952	NA
08NR03-5	176.411	6160	1.65229	20.7589	2.98721	0.181426	3.03043	0.027315	0.51	0.168293	173.722	0.874149	169.286	4.7253	107.711	70.5736	173.722	0.874149	NA
08NR03-11	363.827	11276	1.47387	20.7847	3.32246	0.181206	4.64771	0.0273159	3.25	0.699269	173.727	5.57074	169.098	7.23975	104.771	78.5409	173.727	5.57074	NA
08NR03-78	56.3997	1904	1.82419	22.8771	13.034	0.164975	13.3659	0.0273727	2.96	0.22146	174.084	5.08392	155.048	19.2211	-126.898	323.049	174.084	5.08392	NA
08NR03-80	170.068	6620	1.59574	21.2633	6.93618	0.180872	7.42517	0.0278933	2.65	0.356894	177.35	4.63571	168.81	11.5484	50.6987	165.752	177.35	4.63571	NA
08NR03-48	269.776	8776	1.74113	20.2709	1.80222	0.192324	2.83621	0.0282751	2.19	0.772157	179.744	3.88202	178.61	4.64526	163.609	42.1344	179.744	3.88202	NA
08NR03-58	320.142	11716	1.83385	20.8005	4.37046	0.187542	4.60788	0.0282924	1.46	0.316849	179.852	2.58955	174.53	7.38904	102.979	103.367	179.852	2.58955	NA
08NR03-87	177.811	7208	1.8207	20.4251	3.63309	0.196335	3.73349	0.0290844	0.86	0.230348	184.815	1.56684	182.02	6.22149	145.866	85.2368	184.815	1.56684	NA
08NR03-30	447.181	9940	1.75513	19.2415	2.7592	0.208864	4.72039	0.0291476	3.83	0.811374	185.211	6.99266	192.599	8.28141	284.109	63.1177	185.211	6.99266	NA
08NR03-47	137.794	8740	1.31409	20.5343	4.84222	0.257551	6.26163	0.0383568	3.97	0.634021	242.64	9.45377	232.691	13.022	133.337	113.893	242.64	9.45377	NA
08NR03-2	270.162	11236	0.892462	19.7112	2.47537	0.278342	2.58361	0.0397915	0.74	0.286421	251.541	1.82555	249.341	5.71206	228.672	57.1926	251.541	1.82555	NA
08NR03-24	281.072	20140	4.36458	19.8015	3.24415	0.281055	4.56383	0.0403634	3.21	0.703356	255.085	8.02835	251.494	10.1671	218.108	75.106	255.085	8.02835	NA
08NR03-12	148.732	8292	2.48642	20.4004	5.32583	0.276992	5.45935	0.0409831	1.2	0.219806	258.924	3.04551	248.269	12.0246	148.704	124.924	258.924	3.04551	NA
08NR03-19	1406.69	39764	4.58048	18.6913	3.02199	0.318988	3.34325	0.0432428	1.43	0.427727	272.902	3.82105	281.124	8.20998	350.075	68.3231	272.902	3.82105	NA
08NR03-50	201.579	16196	3.12754	19.1809	2.7576	0.311151	2.81191	0.0432851	0.55	0.195596	273.163	1.47101	275.073	6.77574	291.325	62.9997	273.163	1.47101	NA
08NR03-45	399.615	22508	1.07757	18.8035	2.53156	0.335771	5.39133	0.045791	4.76	0.882899	288.629	13.4357	293.962	13.7614	336.531	57.37	288.629	13.4357	NA
08NR03-70	538.365	30360	0.774267	19.1491	1.32078	0.35413	1.54417	0.0491825	0.8	0.518078	309.501	2.41751	307.823	4.10043	295.105	30.1487	309.501	2.41751	NA
08NR03-94	429.833	20492	0.857188	18.4609	1.133	0.379169	3.87915	0.0507673	3.71	0.956396	319.231	11.555	326.426	10.8292	378.04	25.4838	319.231	11.555	NA
08NR03-10	292.164	13496	2.07755	18.4754	2.48814	0.38835	2.77556	0.0520375	1.23	0.443154	327.019	3.92201	333.163	7.88339	376.271	55.9898	327.019	3.92201	NA
08NR03-38	290.147	20068	1.74889	18.7804	1.34761	0.383605	3.98479	0.0522503	3.75	0.941078	328.322	12.0038	329.687	11.2183	339.314	30.52	328.322	12.0038	NA
08NR03-72	457.772	30036	2.918	18.7097	1.76021	0.405579	2.44017	0.0550352	1.69	0.692574	345.361	5.68301	345.687	7.14954	347.853	39.8061	345.361	5.68301	NA
08NR03-59	59.7111	5332	1.79662	19.5323	7.96093	0.393617	8.10662	0.0557604	1.53	0.188735	349.791	5.20919	337.008	23.2529	249.7	183.461	349.791	5.20919	NA
08NR03-23	295.843	31548	4.92104	18.4808	2.96216	0.452121	4.17348	0.0606003	2.94	0.704447	379.275	10.829	378.764	13.1949	375.618	66.6672	379.275	10.829	NA
08NR03-46	119.548	9148	2.52579	18.5274	3.65229	0.45214	3.89035	0.0607557	1.34	0.344442	380.22	4.9476	378.777	12.3	369.943	82.2913	380.22	4.9476	NA
08NR03-81	988.028	51632	5.42823	18.2052	0.910676	0.462474	3.86871	0.0610636	3.76	0.9719	382.091	13.9492	385.977	12.4227	409.324	20.372	382.091	13.9492	NA
08NR03-6	551.784	53776	4.38724	18.1433	1.93015	0.470812	2.40216	0.0619531	1.43	0.595297	387.492	5.37789	391.75	7.80785	416.942	43.1233	387.492	5.37789	NA
08NR03-7	164.671	19664	1.25908	18.4307	1.65712	0.478425	1.85786	0.0639522	0.84	0.452134	399.616	3.25485	396.992	6.10467	381.719	37.251	399.616	3.25485	NA
08NR03-76	132.465	13248	1.56626	18.4211	2.56002	0.486209	3.10665	0.0649588	1.76	0.566526	405.712	6.92048	402.324	10.32	382.892	57.5407	405.712	6.92048	NA
08NR03-26	197.003	25016	0.930784	17.9747	1.51336	0.508685	2.73654	0.0663146	2.28	0.833168	413.914	9.14066	417.565	9.36904	437.76	33.6874	413.914	9.14066	NA
08NR03-71	201.579	13236	2.81765	18.2073	2.36669	0.502695	3.09858	0.0663819	2	0.645456	414.321	8.02575	413.525	10.5255	409.064	52.9506	414.321	8.02575	NA
08NR03-49	753.75	71888	3.58527	18.073	2.08027	0.510477	5.58211	0.0669123	5.18	0.927965	417.526	20.9424	418.77	19.1576	425.607	46.4065	417.526	20.9424	NA
08NR03-96	79.5987	8808	1.96072	18.3828	4.6845	0.502694	4.71111	0.0670214	0.500001	0.106132	418.185	2.02455	413.525	16.0038	387.576	105.242	418.185	2.02455	NA
08NR03-73	214.883	19092	2.83506	18.1956	2.14008	0.513786	2.54644	0.0678027	1.38	0.541933	422.904	5.64876	420.992	8.7759	410.512	47.8685	422.904	5.64876	NA
08NR03-74	461.315	38512	2.09407	17.9239	0.663731	0.5239	2.94575	0.0681053	2.87	0.974285	424.731	11.7969	427.753	10.2833	444.051	14.7578	424.731	11.7969	NA
08NR03-44	462.3	37216	0.654125	17.9706	0.981804	0.532617	3.75078	0.0694188	3.62	0.965133	432.653	15.1481	433.545	13.236	438.262	21.8528	432.653	15.1481	NA
08NR03-97	96.8217	8292	2.12267	17.6371	5.65911	0.550014	6.62782	0.0703556	3.45	0.520533	438.298	14.6187	445.006	23.8846	479.815	125.141	438.298	14.6187	NA
08NR03-67	293.873	23756	0.76651	17.8232	1.24166	0.569846	2.69329	0.0736619	2.39	0.88739	458.18	10.5704	457.915	9.92721	456.565	27.5484	458.18	10.5704	NA
08NR03-98	853.825	39972	1.35528	17.4696	0.833775	0.598117	4.66511	0.0757823	4.59	0.983899	470.899	20.8438	476.038	17.7302	500.861	18.3584	470.899	20.8438	NA
08NR03-27	35.5853	5780	0.222312	18.0644	5.53713	0.597057	6.09609	0.0782238	2.55	0.418301	485.512	11.9258	475.364	23.1447	426.666	123.572	485.512	11.9258	NA
08NR03-88	194.541	23304	1.12051	17.5022	3.02407	0.681039	3.06513	0.0864495	0.5	0.163125	534.504	2.56473	527.402	12.6094	496.76	66.6441	534.504	2.56473	107.598
08NR03-8	78.1988	9484	1.15839	17.4715	4.14744	0.687549	4.50542	0.087123	1.76	0.39064	538.5	9.09255	531.327	18.6407	500.619	91.3572	538.5	9.09255	107.567
08NR03-41	40.4896	4932	0.813741	17.5865	3.23075	0.7039	3.51314	0.0897819	1.38	0.392811	554.247	7.32903	541.117	14.7375	486.158	71.331	554.247	7.32903	114.005
08NR03-37	291.797	44520	8.77977	14.7575	1.62046	0.947019	2.62884	0.101361	2.07	0.78742	622.379	12.2809	676.549	12.9839	861.271	33.6269	622.379	12.2809	72.2628
08NR03-35	78.4402	22096	3.69798	14.093	1.99071	1.44899	2.80068	0.148105	1.97	0.7034	890.332	16.3822	909.456	16.8272	956.16	40.7036	890.332	16.3822	93.1153
08NR03-52	42.9514	14320	2.995	14.523	2.2578	1.46105	4.20716	0.153893	3.55	0.8438	922.748	30.5213	914.441	25.3661	894.426	46.6116	922.748	30.5213	103.167
08NR03-34	28.6053	8772	2.76101	14.2316	4.37294	1.5586	4.50917	0.160875	1.1	0.243948	961.638	9.82688	953.914	27.8977	936.12	89.7231	961.638	9.82688	102.726
08NR03-57	96.368	23268	1.79877	14.056	2.12064	1.57946	2.27007	0.161016	0.81	0.356817	962.419	7.24159	962.155	14.1149	961.533	43.3254	962.419	7.24159	100.092
08NR03-56	57.5968	15084	1.2434	14.0216	2.3339	1.64446	2.49078	0.167232	0.870001	0.349289	996.842	8.03526	987.427	15.7285	966.543	47.6473	966.543	47.6473	103.135
08NR03-64	138.827	31612	3.39913	13.8903	2.08104	1.61801	3.32247	0.163002	2.59	0.779541	973.436	23.4008	977.219	20.8527	985.716	42.3585	985.716	42.3585	98.7542
08NR03-18	93.4041	24252	1.62364	13.8228	2.34364	1.71168	3.8306	0.1716	3.03	0.790998	1020.92	28.609	1012.91	24.5565	995.617	47.6336	995.617	47.6336	102.542
08NR03-16	147.217	37220	1.7756	13.8172	1.81112	1.67809	2.88058	0.168165	2.24	0.77762	1001.99	20.7873	1000.26	18.3294	996.437	36.8026	996.437	36.8026	100.557
08NR03-66	302.562	74752	3.07321	13.8167	1.1205	1.64482	2.70317	0.164825	2.46	0.910043	983.533	22.4397	987.564	17.0713	996.513	22.7692	996.513	22.7692	98.6975
08NR03-39	153.26	34228	3.15979	13.8114	1.1413	1.59456	2.50509	0.159726	2.23	0.890189	955.254	19.7991	968.082	15.6338	997.303	23.189	997.303	23.189	95.7837
08NR03-99	404.481	101652	2.41857	13.7872	1.34031	1.68667	2.08721	0.168658	1.6	0.766574	1004.71	14.8853	1003.51	13.3057	1000.85	27.2167	1000.85	27.2167	100.385
08NR03-85	63.5534	13948	0.626784	13.718	1.84357	1.75122	2.07855	0.174233	0.960001	0.461861	1035.39	9.18262	1027.61	13.4348	1011.07	37.3807	1011.07	37.3807	102.406
08NR03-55	135.168	34352	1.36991	13.6594	1.65277	1.73554	4.68146	0.171935	4.38	0.935606	1022.76	41.4247	1021.81	30.1669	1019.75	33.467	1019.75	33.467	100.295
08NR03-22	65.2043	16640	2.34467	13.6279	2.30669	1.76446	3.09264	0.174397	2.06	0.666097	1036.29	19.7202	1032.49	20.0455	1024.42	46.6775	1024.42	46.6775	101.159
08NR03-1	415.178	102756	3.44444	13.5426	2.30005	1.74627	3.44893	0.171518	2.57	0.745159	1020.47	24.2557	1025.78	22.2716	1037.11	46.4537	1037.11	46.4537	98.3951
08NR03-43	306.81	56748	2.80557	13.5232	0.500443	1.71639	2.83453	0.168343	2.79	0.984291	1002.97	25.9148	1014.67	18.1878	1040	10.103	1040	10.103	96.4398
08NR03-91	142.187	42804	3.46981	13.4527	1.6104	1.82449	3.1352	0.178013	2.69	0.857999	1056.11	26.2044	1054.3	20.5663	1050.54	32.4574	1050.54	32.4574	100.53
08NR03-32	52.2677	15332	2.27411	13.4324	1.16447	1.79992	3.13434	0.17535	2.91	0.928425	1041.52	27.9867	1045.43	20.4617	1053.59	23.4591	1053.59	23.4591	98.854
08NR03-62	67.1931	13832	2.0745	13.4223	1.64343	1.84189	4.91302	0.179304	4.63	0.942394	1063.17	45.3807	1060.54	32.3431	1055.09	33.0985	1055.09	33.0985	100.766
08NR03-79	220.588	46276	1.26024	13.3345	0.990728	1.86853	2.81978	0.180707	2.64	0.936244	1070.84	26.047	1070.01	18.6524	1068.31	19.9124	1068.31	19.9124	100.236
08NR03-25	196.144	53616	2.34109	13.3293	1.72152	1.71523	5.16532	0.165816	4.87	0.942827	989.017	44.653	1014.24	33.1434	1069.1	34.6009	1069.1	34.6009	92.5096
08NR03-93	381.407	33424	1.92875	13.3096	1.40027	1.70164	2.53236	0.16426	2.11	0.833214	980.406	19.1904	1009.15	16.1969	1072.06	28.1302	1072.06	28.1302	91.4504
08NR03-17	221.312	47708	2.47327	13.3088	2.22031	1.81975	4.01066	0.17565	3.34	0.832781	1043.17	32.1691	1052.59	26.2871	1072.18	44.6088	1072.18	44.6088	97.2939
08NR03-83	216.225	53228	2.36313	13.3067	0.920633	1.84116	2.51459	0.177689	2.34	0.930569	1054.34	22.7597	1060.28	16.5475	1072.5	18.4917	1072.5	18.4917	98.3063
08NR03-82	884.023	172188	4.33189	13.2782	0.540179	1.84528	2.62616	0.177706	2.57	0.978617	1054.43	24.9987	1061.75	17.2954	1076.81	10.8431	1076.81	10.8431	97.922
08NR03-65	189.801	52016	2.98521	13.2569	1.24122	1.87365	1.74743	0.180148	1.23	0.70389	1067.78	12.1036	1071.82	11.5692	1080.03	24.9066	1080.03	24.9066	98.8656
08NR03-31	113.996	36172	3.1226	13.254	1.40073	1.81636	2.97976	0.174602	2.63	0.882622	1037.42	25.202	1051.38	19.5154	1080.46	28.1043	1080.46	28.1043	96.0161
08NR03-29	89.7742	24864	2.87575	13.1575	1.7604	1.8759	2.5106	0.179012	1.79	0.712977	1061.57	17.5201	1072.62	16.6296	1095.11	35.2454	1095.11	35.2454	96.9376
08NR03-3	183.304	35316	4.2391	13.102	1.42021	1.85684	3.16637	0.176447	2.83	0.893768	1047.53	27.362	1065.87	20.8998	1103.56	28.3971	1103.56	28.3971	94.9227
08NR03-51	72.6959	25832	2.42174	12.9063	1.65407	2.01056	3.53134	0.188199	3.12	0.883518	1111.61	31.857	1119.08	23.9508	1133.6	32.9277	1133.6	32.9277	98.0608
08NR03-4	84.5126	26512	3.55069	12.8107	2.20029	2.14088	2.47808	0.198914	1.14	0.460034	1169.48	12.1927	1162.11	17.1525	1148.38	43.7078	1148.38	43.7078	101.837
08NR03-9	162.76	50416	3.44671	12.769	2.49017	2.04533	3.86815	0.189417	2.96	0.765224	1118.22	30.3877	1130.74	26.3852	1154.85	49.4217	1154.85	49.4217	96.8276
08NR03-14	131.615	42576	2.91333	12.7634	1.32108	2.06985	2.5576	0.191604	2.19	0.85627	1130.06	22.7006	1138.88	17.5117	1155.71	26.214	1155.71	26.214	97.7803
08NR03-54	47.5565	13032	2.61119	12.7221	2.52221	2.16329	3.27561	0.199606	2.09	0.638049	1173.2	22.4182	1169.33	22.7494	1162.14	50.0043	1162.14	50.0043	100.952
08NR03-13	336.255	107244	2.97184	12.7181	1.33012	2.06801	2.96509	0.190754	2.65	0.893735	1125.46	27.3664	1138.27	20.2965	1162.77	26.3643	1162.77	26.3643	96.791
08NR03-69	177.772	36420	2.23835	12.6617	0.980665	2.15497	3.04238	0.197893	2.88	0.946626	1163.99	30.6709	1166.65	21.1034	1171.58	19.4133	1171.58	19.4133	99.3525
08NR03-60	83.1418	24156	2.16121	12.6541	1.61145	2.15209	2.18796	0.197511	1.48	0.676429	1161.94	15.736	1165.73	15.1692	1172.76	31.8954	1172.76	31.8954	99.0773
08NR03-28	181.643	51568	3.92362	12.4975	1.78082	2.09569	2.48976	0.189955	1.74	0.698862	1121.13	17.9056	1147.39	17.1158	1197.36	35.1227	1197.36	35.1227	93.6336
08NR03-92	313.085	75036	1.54595	12.3182	0.970599	2.34532	1.87138	0.209531	1.6	0.854984	1226.32	17.8678	1226.14	13.3224	1225.8	19.0636	1225.8	19.0636	100.042
08NR03-33	58.6298	20308	0.699779	11.7456	2.15035	2.56627	2.72881	0.218613	1.68	0.615653	1274.54	19.4285	1291.08	19.941	1318.68	41.6829	1318.68	41.6829	96.6529
08NR03-63	191.732	59768	2.39358	10.9243	1.04018	3.15501	1.91679	0.249972	1.61	0.839946	1438.33	20.7557	1446.22	14.7796	1457.83	19.7793	1457.83	19.7793	98.6625
08NR03-75	197.505	73600	1.74137	10.7773	0.9502	3.29619	2.26859	0.257645	2.06	0.908055	1477.78	27.2052	1480.15	17.6749	1483.54	18.0054	1483.54	18.0054	99.6118
08NR03-84	87.5537	30868	0.980847	10.6881	0.920173	3.36186	2.57035	0.260604	2.4	0.933724	1492.93	31.9842	1495.56	20.1181	1499.26	17.3996	1499.26	17.3996	99.5776
08NR03-95	218.435	61504	1.99496	10.5991	1.00018	3.36766	2.05921	0.258878	1.8	0.874121	1484.1	23.8619	1496.91	16.123	1515.07	18.8728	1515.07	18.8728	97.9559
08NR03-90	231.99	9060	1.66417	10.0948	1.43243	3.50112	2.13267	0.256332	1.58001	0.740858	1471.05	20.7815	1527.47	16.8454	1606.5	26.7081	1606.5	26.7081	91.5684
08NR03-21	27.4854	11932	2.80031	10.0921	1.88331	3.81536	2.11843	0.279265	0.970003	0.457887	1587.66	13.6505	1595.99	17.0448	1607	35.112	1607	35.112	98.7965
08NR03-53	63.8817	26708	1.73559	9.8078	0.860404	4.10516	2.01313	0.292012	1.82	0.904065	1651.58	26.5171	1655.33	16.4384	1660.08	15.9304	1660.08	15.9304	99.4877
08NR03-856	89.9383	35288	0.672255	9.73476	0.720761	4.18056	2.60183	0.295161	2.5	0.960864	1667.27	36.7281	1670.22	21.3221	1673.91	13.3236	1673.91	13.3236	99.6031
08NR03-36	119.422	51924	2.02224	9.09306	1.01022	4.72653	2.59473	0.311711	2.39	0.921097	1749.12	36.6129	1771.96	21.749	1798.96	18.3815	1798.96	18.3815	97.2295
08NR03-77	79.5214	62504	0.755031	5.02084	1.08006	15.1497	4.1336	0.55167	3.99	0.965261	2832.11	91.4535	2824.7	39.3927	2819.4	17.6417	2819.4	17.6417	100.451
08NR02 La Casita (Carbonera) Formation 13R 640827 2824446 (103° 35.93’W 25° 31.94’N)
08NR02-47	234.909	2276	0.434525	20.5133	6.80282	0.173734	6.92781	0.0258475	1.31001	0.189094	164.507	2.12778	162.654	10.4125	135.75	160.014	164.507	2.12778	NA
08NR02-80	143.332	7428	1.6871	20.7416	2.93145	0.176717	4.09549	0.026584	2.86	0.69833	169.133	4.7743	165.232	6.24522	109.676	69.2314	169.133	4.7743	NA
08NR02-83	143.389	5984	1.95587	20.3826	6.92965	0.187444	7.04327	0.0277095	1.26	0.178894	176.197	2.19002	174.446	11.2896	150.748	162.553	176.197	2.19002	NA
08NR02-100	246.507	8672	1.58648	20.4541	2.57014	0.18782	3.41586	0.0278626	2.25	0.658692	177.157	3.93176	174.768	5.48436	142.536	60.3267	177.157	3.93176	NA
08NR02-8	700.366	31148	2.67182	19.9889	2.63286	0.196808	3.45034	0.0285318	2.23	0.646314	181.353	3.98782	182.421	5.76121	196.258	61.1929	181.353	3.98782	NA
08NR02-62	150.488	7116	1.55406	20.5346	3.34003	0.195737	3.66963	0.0291512	1.52	0.41421	185.234	2.77549	181.512	6.0995	133.311	78.5389	185.234	2.77549	NA
08NR02-93	328.784	10464	1.31971	20.4507	2.88089	0.198174	3.26667	0.0293936	1.54	0.471429	186.752	2.83472	183.58	5.48612	142.923	67.6178	186.752	2.83472	NA
08NR02-34	222.634	9976	1.60769	20.6848	3.75606	0.198487	6.69325	0.0297772	5.54	0.8277	189.153	10.3269	183.846	11.256	116.149	88.6087	189.153	10.3269	NA
08NR02-30	423.035	14040	2.44029	19.3283	5.58953	0.215325	5.92986	0.0301847	1.98	0.333903	191.704	3.73985	198.012	10.6682	273.813	128.164	191.704	3.73985	NA
08NR02-94	436.303	20356	1.85695	20.3394	2.05407	0.205742	3.2279	0.03035	2.49	0.7714	192.738	4.72815	189.973	5.5927	155.718	48.0942	192.738	4.72815	NA
08NR02-29	334.335	17264	2.98053	20.0931	2.03061	0.218229	2.50685	0.0318024	1.47	0.586394	201.819	2.92078	200.435	4.55979	184.162	47.297	201.819	2.92078	NA
08NR02-21	661.758	13452	1.90082	19.8485	2.66437	0.269399	2.75226	0.0387813	0.69	0.250703	245.274	1.6606	242.213	5.93092	212.616	61.7403	245.274	1.6606	NA
08NR02-49	175.77	10528	3.46857	18.6528	3.90568	0.35032	4.68641	0.0473924	2.59	0.552661	298.493	7.55471	304.962	12.3458	354.73	88.2398	298.493	7.55471	NA
08NR02-67	702.909	7572	1.4585	16.7958	3.75763	0.421461	3.8989	0.0513402	1.04	0.266742	322.744	3.2739	357.095	11.7385	586.83	81.5625	322.744	3.2739	NA
08NR02-33	197.76	11512	0.738561	19.0586	2.59664	0.371557	4.44687	0.0513587	3.61	0.811807	322.858	11.3681	320.807	12.2325	305.918	59.1652	322.858	11.3681	NA
08NR02-79	146.844	14188	1.54711	18.9183	2.62992	0.377587	3.5943	0.0518083	2.45	0.681635	325.614	7.77942	325.261	10.0036	322.716	59.7449	325.614	7.77942	NA
08NR02-39	283.273	18660	1.36928	19.0099	3.21463	0.385391	3.72401	0.0531351	1.88	0.504832	333.741	6.11468	330.997	10.5193	311.736	73.1771	333.741	6.11468	NA
08NR02-96	168.679	14456	3.24226	19.1679	2.14636	0.391353	3.70503	0.0544053	3.02	0.815107	341.511	10.0452	335.357	10.582	292.875	49.0181	341.511	10.0452	NA
08NR02-36	277.242	20704	1.12646	18.5682	2.65142	0.419998	4.28015	0.0565608	3.36	0.78502	354.676	11.5952	356.049	12.855	364.99	59.7842	354.676	11.5952	NA
08NR02-2	757.589	64432	6.91371	18.478	1.28053	0.453631	2.71143	0.0607934	2.39	0.881454	380.449	8.82962	379.819	8.59186	375.96	28.8133	380.449	8.82962	NA
08NR02-48	241.502	22900	2.14167	18.5452	2.59195	0.452629	4.79157	0.0608797	4.03	0.841061	380.973	14.9084	379.119	15.161	367.785	58.4139	380.973	14.9084	NA
08NR02-59	146.91	13032	1.12134	18.635	2.58863	0.454441	3.03272	0.0614194	1.58	0.520984	384.252	5.89378	380.384	9.62181	356.891	58.4513	384.252	5.89378	NA
08NR02-71	354.205	34460	5.31141	18.4908	1.48201	0.459558	2.24776	0.0616305	1.69	0.751859	385.534	6.32451	383.95	7.18632	374.395	33.3569	385.534	6.32451	NA
08NR02-74	283.713	30368	2.66879	18.2383	1.37204	0.489696	4.36143	0.0647753	4.14	0.94923	404.601	16.2357	404.704	14.5585	405.267	30.7144	404.601	16.2357	NA
08NR02-73	346.739	31844	1.95894	18.1541	1.48168	0.496597	3.94854	0.0653849	3.66	0.926925	408.291	14.4801	409.396	13.3043	415.614	33.1094	408.291	14.4801	NA
08NR02-43	173.594	17708	1.96898	18.1402	1.90493	0.502562	2.76202	0.0661198	2	0.724107	412.736	7.99602	413.435	9.38052	417.319	42.557	412.736	7.99602	NA
08NR02-66	312.459	29148	1.90514	18.6569	2.77152	0.490064	4.59894	0.0663119	3.67	0.79801	413.897	14.7127	404.954	15.3592	354.236	62.612	413.897	14.7127	NA
08NR02-46	251.185	25840	3.05757	18.3561	1.5935	0.50434	2.74897	0.0671434	2.24	0.814851	418.923	9.08547	414.636	9.35814	390.829	35.7634	418.923	9.08547	NA
08NR02-1	116.835	14068	1.75809	18.203	2.088	0.531294	3.72932	0.0701418	3.09	0.828569	437.01	13.0561	432.668	13.1389	409.595	46.7108	437.01	13.0561	NA
08NR02-25	112.678	14104	1.13662	18.0316	3.31289	0.563196	4.55765	0.0736533	3.13	0.686758	458.128	13.8418	453.604	16.6746	430.722	73.8485	458.128	13.8418	NA
08NR02-56	160.439	20224	1.30533	18.0371	3.28025	0.572633	3.99481	0.0749103	2.28	0.570741	465.671	10.2429	459.716	14.7708	430.045	73.1291	465.671	10.2429	NA
08NR02-60	217.818	32992	1.58449	17.1888	1.91084	0.704317	2.67361	0.0878037	1.87	0.699429	542.535	9.73022	541.366	11.2192	536.427	41.8206	542.535	9.73022	101.139
08NR02-31	388.771	43488	7.97393	16.6603	2.59031	0.74067	4.27431	0.0894965	3.4	0.79545	552.559	18.0044	562.797	18.4694	604.382	56.0492	552.559	18.0044	91.4254
08NR02-84	174.841	25668	1.80202	16.5692	1.60243	0.817199	1.90491	0.0982036	1.03	0.540708	603.873	5.93745	606.484	8.69842	616.236	34.6023	603.873	5.93745	97.9938
08NR02-86	114.708	14804	1.33231	16.5598	1.05542	0.845534	1.16787	0.101551	0.5	0.428131	623.494	2.97146	622.195	5.43297	617.456	22.7839	623.494	2.97146	100.978
08NR02-91	443.182	80332	2.08174	16.2254	0.76049	0.878938	1.53207	0.103431	1.33	0.868105	634.486	8.03668	640.409	7.27717	661.338	16.2983	634.486	8.03668	95.9397
08NR02-24	166.96	21864	1.40467	15.9818	2.11401	0.987892	2.8625	0.114507	1.93	0.674235	698.87	12.7828	697.644	14.4451	693.674	45.069	698.87	12.7828	100.749
08NR02-14	145.19	26960	6.7537	13.8881	1.87279	1.25638	4.34439	0.12655	3.92	0.902313	768.156	28.387	826.281	24.567	986.04	38.1165	768.156	28.387	77.9031
08NR02-6	260.925	56828	2.77617	13.9381	1.43067	1.29914	4.55074	0.131328	4.32	0.949297	795.439	32.3277	845.341	26.1155	978.716	29.1504	795.439	32.3277	81.2737
08NR02-61	71.5436	18444	3.77216	14.2825	1.93944	1.50406	4.11562	0.1558	3.63	0.882006	933.396	31.5438	932.033	25.1058	928.792	39.8233	933.396	31.5438	100.496
08NR02-81	43.1071	11352	2.88599	14.4792	3.66258	1.49039	4.3302	0.15651	2.31	0.533463	937.354	20.1523	926.476	26.3189	900.653	75.5538	937.354	20.1523	104.075
08NR02-78	72.1875	19712	2.29952	13.9993	1.6018	1.58718	2.20133	0.161151	1.51	0.685949	963.168	13.5095	965.191	13.7133	969.784	32.6828	963.168	13.5095	99.3178
08NR02-27	142.639	41012	5.47014	14.0136	2.73064	1.59317	3.57021	0.161924	2.3	0.64422	967.458	20.6624	967.541	22.2753	967.71	55.7384	967.458	20.6624	99.974
08NR02-22	275.881	67200	1.67008	13.8624	1.45016	1.62912	3.3772	0.163792	3.05	0.903116	977.815	27.6718	981.52	21.2516	989.802	29.4994	989.802	29.4994	98.7889
08NR02-23	43.3842	13044	1.45742	13.785	1.51971	1.71128	3.74245	0.17109	3.42	0.91384	1018.12	32.2095	1012.76	23.9891	1001.19	30.8589	1001.19	30.8589	101.691
08NR02-88	90.9088	27376	2.94739	13.7579	1.28232	1.7318	1.48052	0.172802	0.74	0.499823	1027.53	7.0287	1020.42	9.53031	1005.17	26.0217	1005.17	26.0217	102.224
08NR02-12	153.968	39696	2.00387	13.7541	1.15044	1.65767	2.2126	0.16536	1.89	0.854197	986.494	17.2883	992.486	14.0139	1005.73	23.3429	1005.73	23.3429	98.087
08NR02-72	52.048	12036	2.50211	13.7266	1.84789	1.6633	2.59367	0.16559	1.82	0.701709	987.765	16.6678	994.634	16.4487	1009.8	37.4756	1009.8	37.4756	97.8183
08NR02-10	33.1311	9980	1.19696	13.6863	2.591	1.71155	5.47227	0.169893	4.82	0.880805	1011.52	45.1233	1012.86	35.0866	1015.76	52.5022	1015.76	52.5022	99.5831
08NR02-32	82.6932	25432	5.29685	13.6604	1.9025	1.77379	2.3213	0.175737	1.33	0.572956	1043.64	12.8151	1035.91	15.0737	1019.6	38.524	1019.6	38.524	102.358
08NR02-13	45.2425	13272	1.19804	13.6502	2.31243	1.80698	2.70321	0.178892	1.4	0.517903	1060.92	13.6951	1047.99	17.6713	1021.11	46.8172	1021.11	46.8172	103.898
08NR02-9	43.4576	15604	1.93054	13.6068	2.47411	1.82521	4.31889	0.180123	3.54	0.819655	1067.64	34.8311	1054.56	28.3385	1027.55	50.0431	1027.55	50.0431	103.902
08NR02-85	214.541	63644	1.40693	13.5985	1.16036	1.73728	2.18379	0.17134	1.85	0.847152	1019.49	17.4448	1022.46	14.074	1028.79	23.4638	1028.79	23.4638	99.096
08NR02-15	883.732	197400	5.20942	13.5715	0.920051	1.71472	3.09969	0.168779	2.96	0.954933	1005.38	27.5548	1014.05	19.8825	1032.81	18.5927	1032.81	18.5927	97.3444
08NR02-45	292.744	72388	3.4595	13.5481	0.670471	1.71567	2.95701	0.168581	2.88	0.973955	1004.29	26.7832	1014.41	18.971	1036.29	13.5433	1036.29	13.5433	96.9114
08NR02-69	319.925	90776	3.57484	13.5328	0.910053	1.79681	4.08272	0.176355	3.98	0.97484	1047.03	38.4641	1044.3	26.639	1038.57	18.3726	1038.57	18.3726	100.815
08NR02-41	198.045	52684	3.33239	13.5328	1.18011	1.70853	1.76317	0.167691	1.31	0.74298	999.377	12.1275	1011.73	11.2936	1038.57	23.8262	1038.57	23.8262	96.2263
08NR02-37	49.9208	11564	1.875	13.5325	1.75602	1.75053	3.21243	0.171809	2.69	0.837372	1022.07	25.425	1027.36	20.7624	1038.62	35.4568	1038.62	35.4568	98.4069
08NR02-3	155.557	59372	4.30942	13.4299	1.2312	1.86661	2.43431	0.181814	2.1	0.862668	1076.88	20.8265	1069.33	16.0963	1053.96	24.8023	1053.96	24.8023	102.175
08NR02-18	98.2033	30604	1.16226	13.3966	1.14078	1.82981	3.22828	0.177786	3.02	0.935483	1054.87	29.3873	1056.21	21.1989	1058.97	22.9632	1058.97	22.9632	99.6129
08NR02-53	271.968	62032	2.95199	13.3907	0.680169	1.79303	1.16027	0.174136	0.94	0.810155	1034.86	8.98703	1042.93	7.56326	1059.85	13.6885	1059.85	13.6885	97.642
08NR02-57	111.391	30124	1.06214	13.3723	1.39106	1.86989	2.16579	0.181351	1.66	0.766464	1074.35	16.4274	1070.49	14.3293	1062.62	27.9846	1062.62	27.9846	101.104
08NR02-52	111.236	28436	2.56698	13.3034	1.79069	1.78723	2.92278	0.172442	2.31	0.790342	1025.55	21.902	1040.82	19.0321	1073	35.9706	1073	35.9706	95.5786
08NR02-65	255.733	59716	1.82419	13.2946	0.860696	1.90122	3.66257	0.183319	3.56	0.971996	1085.08	35.5532	1081.52	24.3753	1074.32	17.2848	1074.32	17.2848	101.001
08NR02-63	60.6466	15832	2.26708	13.2713	1.6116	1.93156	4.21062	0.185917	3.89	0.923854	1099.22	39.3132	1092.08	28.1771	1077.85	32.3487	1077.85	32.3487	101.983
08NR02-89	167.302	52388	1.21497	13.1598	0.911358	1.94199	1.824	0.18535	1.58	0.866228	1096.14	15.9266	1095.69	12.2259	1094.77	18.2465	1094.77	18.2465	100.125
08NR02-95	433.084	95292	2.99114	13.116	0.98031	1.96652	3.38506	0.187067	3.24	0.957148	1105.47	32.9146	1104.12	22.7887	1101.44	19.6057	1101.44	19.6057	100.365
08NR02-75	493.527	85000	1.86802	13.1106	0.88055	1.91807	1.57015	0.182385	1.3	0.827947	1079.99	12.9268	1087.4	10.4799	1102.25	17.608	1102.25	17.608	97.9801
08NR02-58	156.283	30148	1.82234	13.0093	3.35205	1.91379	3.74949	0.18057	1.68	0.448061	1070.09	16.5647	1085.9	25.0107	1117.75	66.8977	1117.75	66.8977	95.7357
08NR02-24	111.219	8728	1.46074	12.9412	2.04863	1.52145	6.61521	0.142801	6.29	0.950839	860.484	50.6687	939.061	40.552	1128.21	40.8172	1128.21	40.8172	76.2699
08NR02-54	283.395	60944	3.42066	12.9104	0.790931	1.99591	2.33786	0.186887	2.2	0.941033	1104.49	22.3313	1114.13	15.8159	1132.96	15.7458	1132.96	15.7458	97.4872
08NR02-7	81.1528	30452	1.68417	12.7938	0.980216	2.10363	2.99495	0.195194	2.83	0.944924	1149.45	29.7945	1149.99	20.6148	1151	19.4629	1151	19.4629	99.8651
08NR02-55	78.1372	26664	2.19154	12.7336	1.19132	2.12952	2.458	0.196667	2.15	0.874696	1157.39	22.778	1158.43	16.9846	1160.36	23.6208	1160.36	23.6208	99.7441
08NR02-38	296.126	86468	1.8653	12.6409	0.780018	2.18115	3.49807	0.199969	3.41	0.974822	1175.16	36.6328	1175.05	24.3581	1174.83	15.4334	1174.83	15.4334	100.028
08NR02-98	234.95	61328	2.17682	12.5864	0.860836	2.22165	2.47456	0.202804	2.32	0.937541	1190.37	25.2168	1187.89	17.3287	1183.37	17.0116	1183.37	17.0116	100.591
08NR02-11	141.889	40520	3.44194	12.5824	1.30029	2.20997	3.05096	0.201673	2.76	0.904633	1184.3	29.8601	1184.2	21.3312	1184	25.6953	1184	25.6953	100.026
08NR02-35	537.425	68196	9.1076	12.4125	1.66016	2.21647	7.22337	0.199535	7.03	0.97323	1172.82	75.3875	1186.26	50.5838	1210.82	32.6787	1210.82	32.6787	96.8619
08NR02-68	53.8411	21984	1.91885	12.2345	2.37407	2.33118	3.71696	0.206852	2.86	0.769446	1212.03	31.6005	1221.84	26.4176	1239.19	46.5436	1239.19	46.5436	97.8083
08NR02-17	169.193	60496	2.6626	12.1337	0.860155	2.42648	2.113	0.213534	1.93	0.913393	1247.62	21.8924	1250.48	15.1946	1255.39	16.8225	1255.39	16.8225	99.3812
08NR02-20	83.9484	28632	2.86271	12.0898	2.50181	2.42897	2.6266	0.21298	0.800001	0.304576	1244.67	9.05512	1251.22	18.8944	1262.47	48.8862	1262.47	48.8862	98.5905
08NR02-4	127.341	66144	3.72131	12.0031	1.20051	2.48238	4.92845	0.216102	4.78	0.969879	1261.25	54.7578	1266.91	35.6871	1276.52	23.4097	1276.52	23.4097	98.8037
08NR02-76	183.88	70644	2.4924	11.736	1.37011	2.65422	3.75862	0.225921	3.5	0.931193	1313.09	41.5802	1315.82	27.7273	1320.25	26.5531	1320.25	26.5531	99.4575
08NR02-50	437.07	131188	1.6966	11.7035	1.15005	2.69766	4.18127	0.228982	4.02	0.961431	1329.16	48.2846	1327.82	30.9837	1325.63	22.2706	1325.63	22.2706	100.267
08NR02-42	42.2432	15284	3.00199	11.5885	2.41079	2.81508	2.75817	0.236601	1.34	0.48583	1369	16.5277	1359.56	20.668	1344.73	46.5634	1344.73	46.5634	101.806
08NR02-97	61.9099	21780	1.69823	11.4743	1.26094	2.83774	2.14076	0.236154	1.73	0.808123	1366.67	21.3054	1365.57	16.0743	1363.83	24.2887	1363.83	24.2887	100.209
08NR02-28	64.086	27184	1.25265	10.9725	1.88098	3.14821	3.8594	0.250534	3.37	0.873192	1441.23	43.5237	1444.56	29.7493	1449.45	35.8096	1449.45	35.8096	99.4327
08NR02-64	42.0883	18424	2.42699	10.6191	1.75067	3.42386	3.35328	0.263696	2.86	0.852897	1508.72	38.4725	1509.89	26.3579	1511.5	33.0511	1511.5	33.0511	99.8159
08NR02-19	48.038	19896	0.850899	10.5751	1.29052	3.43058	2.23111	0.263119	1.82	0.815738	1505.78	24.4399	1511.43	17.5429	1519.34	24.3363	1519.34	24.3363	99.1074
08NR02-87	122.092	36936	1.49655	10.3289	3.5302	2.83606	7.93816	0.212456	7.11	0.895673	1241.89	80.318	1365.13	59.6594	1563.63	66.207	1563.63	66.207	79.4231
08NR02-5	62.1544	32204	1.20792	10.0016	1.16191	3.99871	2.19309	0.29006	1.86	0.848119	1641.83	26.9595	1633.93	17.8153	1623.77	21.6147	1623.77	21.6147	101.112
08NR02-16	281.773	114312	2.23682	9.86314	2.22006	3.7822	3.95241	0.270557	3.27	0.827342	1543.63	44.8887	1588.97	31.7505	1649.66	41.1653	1649.66	41.1653	93.5723
08NR02-92	100.396	53928	1.0379	9.83113	0.89036	4.1318	1.92791	0.294606	1.71	0.88697	1664.5	25.0854	1660.61	15.7624	1655.68	16.4944	1655.68	16.4944	100.533
08NR02-44	75.1949	36716	2.27312	9.81304	1.13063	4.11758	2.78941	0.293051	2.55	0.914171	1656.76	37.2556	1657.8	22.7926	1659.09	20.9374	1659.09	20.9374	99.8594
08NR02-82	87.7057	43140	4.09986	9.7013	1.43049	4.11499	2.10188	0.289533	1.54	0.732677	1639.2	22.2898	1657.28	17.1713	1680.27	26.4202	1680.27	26.4202	97.5553
08NR02-77	22.8209	9568	1.93855	9.56503	2.69598	4.27984	3.02865	0.296902	1.38001	0.455651	1675.93	20.366	1689.49	24.9329	1706.35	49.6346	1706.35	49.6346	98.2168
08NR02-70	172.225	85344	0.603003	8.29597	1.06006	5.94431	1.82861	0.357657	1.49	0.814826	1971.06	25.3037	1967.73	15.8949	1964.22	18.9095	1964.22	18.9095	100.348
Notes for analyses:
Best age is determined from 206Pb/238U age for analyses with 206Pb/238U age < ~1000 Ma and from 206Pb/207Pb age for analyses with 206Pb/238Uage > ~1000 Ma.
	Actual cutoff used is different for each sample, selected to avoid dividing clusters of ages.
Concordance is based on 206Pb/238U age / 206Pb/207Pb age, with 100% = concordant. Value is not reported for 206Pb/238U ages <500 Ma because of large uncertainty in 206Pb/207Pb age.
All uncertainties are reported at the 1-sigma level, and include only measurement errors.
Systematic errors are shown as 206Pb/238U uncertainty, 206Pb/207Pb uncertainty to the right of each sample (in %, at 2-sigma level).
U concentration and U/Th are calibrated relative to Sri Lanka zircon and are accurate to ~20%.
Common Pb correction is from 204Pb, with composition interpreted from Stacey and Kramers (1975).
Uncertainties of 1.5 for 206Pb/ 204Pb, 0.3 for 207Pb/ 204Pb, and 2.0 for 208Pb/ 204Pb are applied to common Pb composition.
U/Pb and 206Pb/207Pb fractionation is calibrated relative to fragments of a large Sri Lanka zircon of 563.5 ± 3.2 Ma (2-sigma).
U decay constants and composition as follows: 238U = 9.8485 x 10-10, 235U = 1.55125 x 10-10, 238U/235U = 137.88
Analytical methods as described by Gehrels et al. (2008).
